# Supplementary material for: High-density lipoproteins suppress Aβ-induced PBMC adhesion to human endothelial cells in bioengineered vessels and in monoculture
Source: Springer Nature journal article supplement (doi:10.1186/s13024-017-0201-0), 2017-08-22
Supplement: MOESM2 [file 14233258]

# Additional File 2

**A** NO production

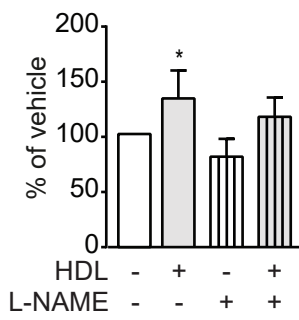

**B** PBMC adhesion HUVEC

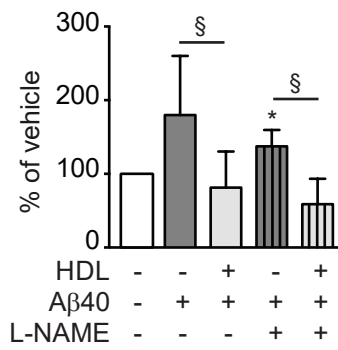

**C** PBMC adhesion HUVEC

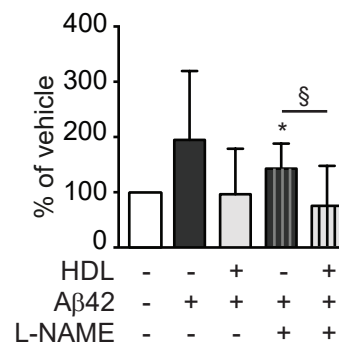

**D** PBMC adhesion HUVEC

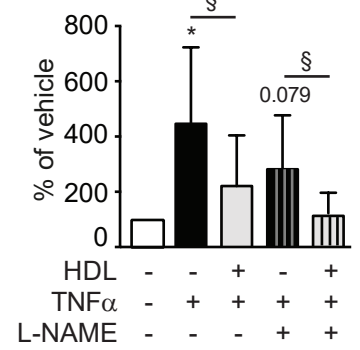

**E** NO production

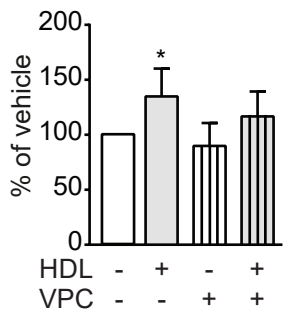

**F** PBMC adhesion HUVEC

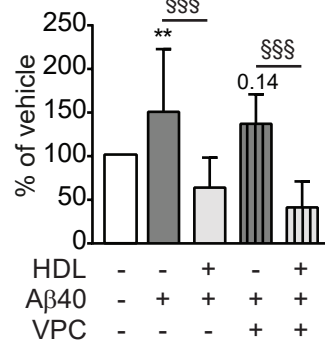

**G** PBMC adhesion HUVEC

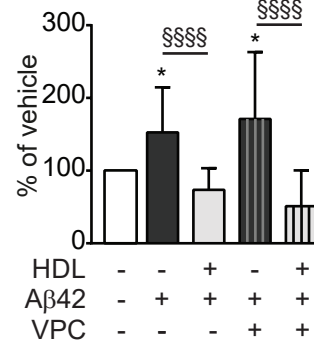

**H** PBMC adhesion HUVEC

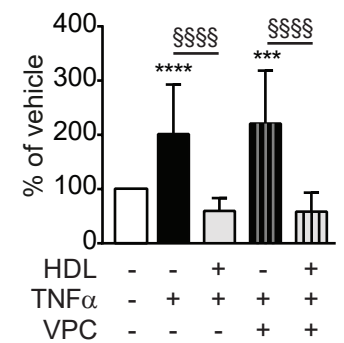

**I** Annexin-1 protein

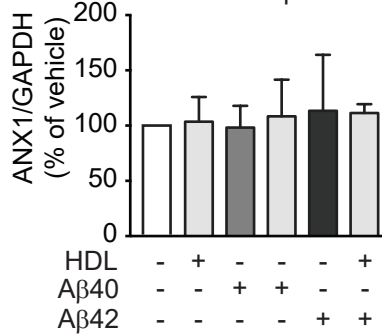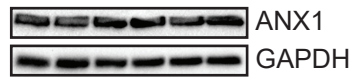

| HDL | Aβ40 | Aβ42 |
|-----|------|------|
| -   | -    | -    |
| +   | -    | -    |
| -   | +    | -    |
| +   | +    | -    |
| -   | -    | +    |
| +   | +    | +    |
