# Supplementary material for: High-density lipoproteins suppress Aβ-induced PBMC adhesion to human endothelial cells in bioengineered vessels and in monoculture
Source: Springer Nature journal article supplement (doi:10.1186/s13024-017-0201-0), 2017-08-22
Supplement: MOESM4 [file 14233258]

**Additional File 4**

| Group (n)             | NCI (5)    | AD (5)        |            |
|-----------------------|------------|---------------|------------|
| Brain regions         | Cortex     | Cortex        | Cerebellum |
| Average age (mean±SD) | 62±3.77    |               | 67±9.67    |
| Sex (% male)          | 100        |               | 40         |
| Stage                 | Control    |               | Braak IV   |
| Aβ40 (ng/mg)          | 0.87±0.36  | 1.42±0.22*    | 0.79±0.13  |
| Aβ42 (ng/mg)          | 0.02±0.03  | 1.58±0.91**   | 0.13±0.2   |
| ICAM (pg/mg)          | 3.98±1.78  | 24.88±15.19** | 4.13±1.22  |
| VCAM (pg/mg)          | 23.08±8.21 | 25.35±8.82    | 22.80±2.19 |
