# Supplementary material for: High-density lipoproteins suppress Aβ-induced PBMC adhesion to human endothelial cells in bioengineered vessels and in monoculture
Source: Springer Nature journal article supplement (doi:10.1186/s13024-017-0201-0), 2017-08-22

# Additional File 8

**A**

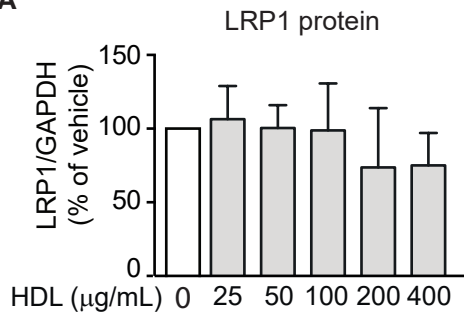

**B**

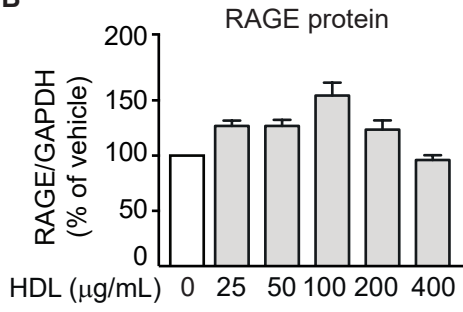

**C**

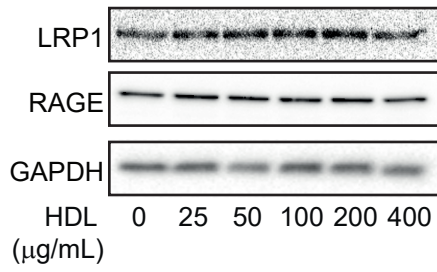

Supplement: MOESM8 [file 14233258]
